# Supplementary material for: Diagnostic accuracy of fat pad sign, X-ray, and computed tomography in elbow trauma: implications for treatment choices—a retrospective study
Source: PeerJ. 2025 Feb 28;13:e18922. doi: 10.7717/peerj.18922 (PMC11874943; doi:10.7717/peerj.18922)
Supplement: Supplemental Information 2 [file peerj-13-18922-s002.xlsx]

## Sheet: Sayfa1
Codebook of Dataset
NAME	LABEL	VALUES
Protocol_no	Protocol no	None
Gender	Gender	{0, Male} {1, Female}
Age	Age	None
Admission_Date	Admission Date	None
CT_Fissure	Fissure type fracture on CT image	{0, Absent} {1, Present}
CT_Linear	Linear type fracture on CT image	{0, Absent} {1, Present}
CT_Spiral	Spiral type fracture on CT image	{0, Absent} {1, Present}
CT_Avulsion	Avulsion type fracture on CT image	{0, Absent} {1, Present}
CT_Fragmented	Fragmented type fracture on CT image	{0, Absent} {1, Present}
CT_Angulation	Angulation type fracture on CT image	{0, Absent} {1, Present}
CT_Stepping_off	Stepping off type fracture on CT image	{0, Absent} {1, Present}
CT_extension_joint_space	Extension to joint space type fracture on CT image	{0, Absent} {1, Present}
CT_Growth_plate_fracture	Growth plate type fracture on CT image	{0, Absent} {1, Present}
XR_Fissure	Fissure type fracture on XR image	{0, Absent} {1, Present}
XR_Linear	Linear type fracture on XR image	{0, Absent} {1, Present}
XR_Spiral	Spiral type fracture on XR image	{0, Absent} {1, Present}
XR_Avulsion	Avulsion type fracture on XR image	{0, Absent} {1, Present}
XR_Fragmented	Fragmented type fracture on XR image	{0, Absent} {1, Present}
XR_Angulation	Angulation type fracture on XR image	{0, Absent} {1, Present}
XR_Stepping_off	Stepping off type fracture on XR image	{0, Absent} {1, Present}
XR_extension_joint_space	Extension to joint space type fracture on XR image	{0, Absent} {1, Present}
XR_Growth_plate_fracture	Growth plate type fracture on XR image	{0, Absent} {1, Present}
Fat_pad_sign_FPS	Fat pad sign (FPS)	{0, Absent} {1, Present}
Fracture_on_XR	Fracture desicion with XR	{0, Absent} {1, Present}
Fracture_XR_and_FPS	Fracture desicion with XR and FPS	{0, Absent} {1, Present}
Fracture_on_CT	Fracture desicion with CT	{0, Absent} {1, Present}
Surgery_with_XR	Surgery Desicion with XR	{0, Conservative}{0, Surgery}
Surgery_with_CT	Surgery Desicion with CT	{0, Conservative}{0, Surgery}
Treatment_Method	Treatment Method	{0, Conservative}{0, Surgery}
